# Supplementary material for: Effect of electron correlation in the decomposition of core level binding energy shifts into initial and final state contributions
Source: Royal Society of Chemistry journal article supplement (doi:10.1039/c9cp01569h), 2019-01-01
Supplement: c9cp01569h1.pdf [file c9cp01569h1.pdf]

## Electronic Supplementary Information (ESI)

# Effect of Electron Correlation in the Decomposition of Core Level Binding Energy Shifts into Initial and Final State Contributions

Marc Figueras, Carmen Sousa, Francesc Illas\*

*Departament de Ciència de Materials i Química Física & Institut de Química Teòrica i Computacional (IQTUB), Universitat de Barcelona, c/ Martí i Franquès 1, 08028 Barcelona, Catalunya, Spain*

*e-mail: francesc.illas@ub.edu*

**Table S1.** DFT (B3LYP) vibrational mode frequencies of the set of molecules studied in the present work at the geometries reported in Table 1 using Basis set 3. Note that the bending mode is twofold degenerate

| Molecule          | Normal Modes Frequencies (cm <sup>-1</sup> ) |                   |                       |
|-------------------|----------------------------------------------|-------------------|-----------------------|
|                   | Bending                                      | Symmetric stretch | Antisymmetric stretch |
| CO <sub>2</sub>   | 668.03                                       | 1372.39           | 2414.06               |
| CS <sub>2</sub>   | 402.96                                       | 668.51            | 1544.26               |
| CSe <sub>2</sub>  | 319.75                                       | 375.87            | 1315.36               |
| SiO <sub>2</sub>  | 290.96                                       | 981.34            | 1427.45               |
| SiS <sub>2</sub>  | 179.57                                       | 503.61            | 904.54                |
| SiSe <sub>2</sub> | 142.92                                       | 290.01            | 742.76                |
| GeO <sub>2</sub>  | 193.58                                       | 872.58            | 1048.20               |
| GeS <sub>2</sub>  | 119.44                                       | 469.52            | 639.16                |
| GeSe <sub>2</sub> | 91.77                                        | 272.36            | 482.06                |

**Table S2.** Hartree-Fock total energy (in hartrees) for ground state (neutral) and 1s core-hole state (cation) of the set of molecules studied in the present work at the geometries reported in Table 1 of the main text and as computed with the three basis sets employed

| Core   | Molecule          | Basis | Neutral      | Cation       |
|--------|-------------------|-------|--------------|--------------|
| C(1s)  | CO <sub>2</sub>   | 1     | -187.722487  | -176.723249  |
|        |                   | 2     | -187.714527  | -176.711286  |
|        |                   | 3     | -187.699411  | -176.693299  |
|        | CS <sub>2</sub>   | 1     | -832.978168  | -822.146356  |
|        |                   | 2     | -832.969641  | -822.133191  |
|        |                   | 3     | -832.941915  | -822.102249  |
|        | CSe <sub>2</sub>  | 1     | -4837.631063 | -4826.821948 |
|        |                   | 2     | -4837.621668 | -4826.807643 |
|        |                   | 3     | -4837.459354 | -4826.645391 |
| Si(1s) | SiO <sub>2</sub>  | 1     | -438.738256  | -370.832349  |
|        |                   | 2     | -438.729819  | -370.819369  |
|        |                   | 3     | -438.693784  | -370.767899  |
|        | SiS <sub>2</sub>  | 1     | -1084.098460 | -1016.250241 |
|        |                   | 2     | -1084.088826 | -1016.236033 |
|        |                   | 3     | -1084.055524 | -1016.193582 |
|        | SiSe <sub>2</sub> | 1     | -5088.783850 | -5020.946813 |
|        |                   | 2     | -5088.774101 | -5020.932598 |
|        |                   | 3     | -5088.604390 | -5020.757956 |
| Ge(1s) | GeO <sub>2</sub>  | 1     | -2225.132314 | -1821.638616 |
|        |                   | 2     | -2225.121899 | -1821.623414 |
|        |                   | 3     | -2225.028544 | -1821.507372 |
|        | GeS <sub>2</sub>  | 1     | -2870.555482 | -2467.111302 |
|        |                   | 2     | -2870.545036 | -2467.096100 |
|        |                   | 3     | -2870.449432 | -2466.980776 |
|        | GeSe <sub>2</sub> | 1     | -6875.252996 | -6471.820821 |
|        |                   | 2     | -6875.242807 | -6471.806102 |
|        |                   | 3     | -6875.007657 | -6471.554468 |

**Table S3.** Hartree-Fock total energy (in hartrees) for ground state (neutral) and Si(2s), Ge(2s) and Ge(3s) core-hole state (cation) of the set of molecules studied in the present work at the geometries reported in Table 1 using Basis 3

| Core   | Molecule          | Neutral      | Cation       |
|--------|-------------------|--------------|--------------|
| Si(2s) | SiO <sub>2</sub>  | -438.693784  | -432.684188  |
|        | SiS <sub>2</sub>  | -1084.055524 | -1078.103901 |
|        | SiSe <sub>2</sub> | -5088.604390 | -5082.667195 |
| Ge(2s) | GeO <sub>2</sub>  | -2225.028544 | -2173.716191 |
|        | GeS <sub>2</sub>  | -2870.449432 | -2819.186969 |
|        | GeSe <sub>2</sub> | -6875.007657 | -6823.760179 |
| Ge(3s) | GeO <sub>2</sub>  | -2225.028544 | -2218.008526 |
|        | GeS <sub>2</sub>  | -2870.449432 | -2863.481008 |
|        | GeSe <sub>2</sub> | -6875.007657 | -6868.054660 |

**Table S4.** CASSCF (8,6) total energy (in hartrees) for ground state (neutral) and 1s core-hole state (cation) of the set of molecules studied in the present work at the geometries reported in Table 1 and Basis 3

| Core   | Molecule          | Neutral      | Cation       |
|--------|-------------------|--------------|--------------|
| C(1s)  | CO <sub>2</sub>   | -187.781602  | -176.852737  |
|        | CS <sub>2</sub>   | -833.009804  | -822.235054  |
|        | CSe <sub>2</sub>  | -4837.528723 | -4826.779273 |
| Si(1s) | SiO <sub>2</sub>  | -438.746104  | -370.852973  |
|        | SiS <sub>2</sub>  | -1084.087873 | -1016.262657 |
|        | SiSe <sub>2</sub> | -5088.636172 | -5020.827946 |
| Ge(1s) | GeO <sub>2</sub>  | -2225.082902 | -1821.587165 |
|        | GeS <sub>2</sub>  | -2870.481605 | -2467.042564 |
|        | GeSe <sub>2</sub> | -6875.038874 | -6471.616441 |

**Table S5.** Total revTPSS energy (in hartrees) for ground state (neutral), and core-hole state (cation) of the set of molecules studied in the present work at the geometries reported in Table 1 using Basis 3. For the cation frozen orbital and  $\Delta$ SCF values are reported

| Core   | Molecule          | Neutral      | Cation         |              |
|--------|-------------------|--------------|----------------|--------------|
|        |                   |              | Frozen Orbital | $\Delta$ SCF |
| C(1s)  | CO <sub>2</sub>   | -188.782725  | -177.365211    | -177.848446  |
|        | CS <sub>2</sub>   | -834.892549  | -823.528864    | -824.111959  |
|        | CSe <sub>2</sub>  | -4841.976523 | -4830.584657   | -4831.221824 |
| Si(1s) | SiO <sub>2</sub>  | -440.242308  | -371.337120    | -372.392209  |
|        | SiS <sub>2</sub>  | -1086.423960 | -1017.556594   | -1018.639942 |
|        | SiSe <sub>2</sub> | -5093.533191 | -5024.649324   | -5025.766418 |
| Ge(1s) | GeO <sub>2</sub>  | -2227.943745 | -1822.762547   | -1824.698384 |
|        | GeS <sub>2</sub>  | -2874.168831 | -2469.022458   | -2470.977421 |
|        | GeSe <sub>2</sub> | -6881.285979 | -6476.129378   | -6478.111044 |

**Table S6.** Total TPSS energy (in hartrees) for ground state (neutral), and core-hole state (cation) of the set of molecules studied in the present work at the geometries reported in Table 1 using Basis 3. For the cation frozen orbital and  $\Delta$ SCF values are reported

| Core   | Molecule          | Neutral      | Frozen Orbital | Cation       |
|--------|-------------------|--------------|----------------|--------------|
| C(1s)  | CO <sub>2</sub>   | -188.686383  | -177.275217    | -177.762499  |
|        | CS <sub>2</sub>   | -834.585478  | -823.223233    | -823.809809  |
|        | CSe <sub>2</sub>  | -4841.039194 | -4829.678312   | -4830.289649 |
| Si(1s) | SiO <sub>2</sub>  | -440.045277  | -371.175008    | -372.235026  |
|        | SiS <sub>2</sub>  | -1086.019931 | -1017.186246   | -1018.273198 |
|        | SiSe <sub>2</sub> | -5092.498944 | -5023.678054   | -5024.769747 |
| Ge(1s) | GeO <sub>2</sub>  | -2227.440571 | -1822.376193   | -1824.306978 |
|        | GeS <sub>2</sub>  | -2873.455841 | -2468.425064   | -2470.374970 |
|        | GeSe <sub>2</sub> | -6879.942173 | -6474.930693   | -6476.878164 |

**BASIS SETS**

**Basis set 1.** Primitive GTO basis used in the present work, these correspond to the fully uncontracted basis from EMSL web page (<https://bse.pnl.gov/bse/portal>). Note that Basis 2 is obtained from Basis 1 by simply removing f and g functions

| Carbon (13s,7p,4d,3f,2g) |              |              |              |              |
|--------------------------|--------------|--------------|--------------|--------------|
| s primitives             | p primitives | d primitives | f primitives | g primitives |
| 33980.0000000            | 34.5100000   | 1.8480000    | 1.4190000    | 1.0110000    |
| 5089.0000000             | 7.9150000    | 0.6490000    | 0.4850000    | 0.4240000    |
| 1157.0000000             | 2.3680000    | 0.2280000    | 0.1870000    |              |
| 326.6000000              | 0.8132000    | 0.0766000    |              |              |
| 106.1000000              | 0.2890000    |              |              |              |
| 38.1100000               | 0.1007000    |              |              |              |
| 14.7500000               | 0.0321800    |              |              |              |
| 6.0350000                |              |              |              |              |
| 2.5300000                |              |              |              |              |
| 0.7355000                |              |              |              |              |
| 0.2905000                |              |              |              |              |
| 0.1111000                |              |              |              |              |
| 0.0414500                |              |              |              |              |

| Silicon (17s,12p,4d,3f,2g) |              |              |              |              |
|----------------------------|--------------|--------------|--------------|--------------|
| s primitives               | p primitives | d primitives | f primitives | g primitives |
| 513000.0000000             | 1122.0000000 | 0.1200000    | 0.2120000    | 0.4610000    |
| 76820.0000000              | 266.0000000  | 0.3020000    | 0.5410000    | 0.2120000    |
| 17470.0000000              | 85.9200000   | 0.7600000    | 0.0846000    |              |
| 4935.0000000               | 32.3300000   | 0.0435000    |              |              |
| 1602.0000000               | 13.3700000   |              |              |              |
| 574.1000000                | 5.8000000    |              |              |              |
| 221.5000000                | 2.5590000    |              |              |              |
| 90.5400000                 | 1.1240000    |              |              |              |
| 38.7400000                 | 0.3988000    |              |              |              |
| 16.9500000                 | 0.1533000    |              |              |              |
| 6.4520000                  | 0.0572800    |              |              |              |
| 2.8740000                  | 0.0200000    |              |              |              |
| 1.2500000                  |              |              |              |              |
| 0.3599000                  |              |              |              |              |
| 0.1699000                  |              |              |              |              |
| 0.0706600                  |              |              |              |              |
| 0.0275000                  |              |              |              |              |

| Germanium (22s,17p,13d,3f,2g) |               |              |              |              |
|-------------------------------|---------------|--------------|--------------|--------------|
| s primitives                  | p primitives  | d primitives | f primitives | g primitives |
| 12360507.0000000              | 24017.4660000 | 864.6741100  | 0.5492000    | 0.4681000    |
| 1850697.8000000               | 5685.7175000  | 261.0376300  | 0.2190000    | 0.2143000    |
| 421131.4200000                | 1846.4859000  | 101.7703000  | 0.0884000    |              |
| 119278.2600000                | 706.2498100   | 45.1166410   |              |              |
| 38912.2770000                 | 299.4561000   | 21.4306860   |              |              |
| 14048.6820000                 | 136.4390400   | 10.6598610   |              |              |
| 5480.6992000                  | 65.3901550    | 5.3922870    |              |              |
| 2274.2055000                  | 32.3937350    | 2.7044970    |              |              |
| 992.2412900                   | 16.4156160    | 1.3285440    |              |              |
| 450.9996600                   | 8.2877870     | 0.6264520    |              |              |
| 211.8202400                   | 4.1126340     | 0.2660130    |              |              |
| 101.4110200                   | 1.9988540     | 0.1063000    |              |              |
| 46.9140900                    | 0.9442910     | 0.0397000    |              |              |
| 23.5089500                    | 0.3412110     |              |              |              |
| 11.6813110                    | 0.1343500     |              |              |              |
| 5.4345260                     | 0.0517350     |              |              |              |
| 2.6088080                     | 0.0185500     |              |              |              |
| 1.1984420                     |               |              |              |              |
| 0.3298080                     |               |              |              |              |
| 0.1554330                     |               |              |              |              |
| 0.0669130                     |               |              |              |              |
| 0.0263900                     |               |              |              |              |



| Oxygen (13s,7p,4d,3f,2g)  |              |              |              |              |
|---------------------------|--------------|--------------|--------------|--------------|
| s primitives              | p primitives | d primitives | f primitives | g primitives |
| 61420.0000000             | 63.4200000   | 3.7750000    | 2.6660000    | 1.8460000    |
| 9199.0000000              | 14.6600000   | 1.3000000    | 0.8590000    | 0.7140000    |
| 2091.0000000              | 4.4590000    | 0.4440000    | 0.3240000    |              |
| 590.9000000               | 1.5310000    | 0.1540000    |              |              |
| 192.3000000               | 0.5302000    |              |              |              |
| 69.3200000                | 0.1750000    |              |              |              |
| 26.9700000                | 0.0534800    |              |              |              |
| 11.1000000                |              |              |              |              |
| 4.6820000                 |              |              |              |              |
| 1.4280000                 |              |              |              |              |
| 0.5547000                 |              |              |              |              |
| 0.2067000                 |              |              |              |              |
| 0.0695900                 |              |              |              |              |
| Sulfur (17s,12p,4d,3f,2g) |              |              |              |              |
| s primitives              | p primitives | d primitives | f primitives | g primitives |
| 727800.0000000            | 1546.0000000 | 0.2030000    | 0.3350000    | 0.6830000    |
| 109000.0000000            | 366.4000000  | 0.5040000    | 0.8690000    | 0.2970000    |
| 24800.0000000             | 118.4000000  | 1.2500000    | 0.1400000    |              |
| 7014.0000000              | 44.5300000   | 0.0748000    |              |              |
| 2278.0000000              | 18.3800000   |              |              |              |
| 814.7000000               | 7.9650000    |              |              |              |
| 313.4000000               | 3.5410000    |              |              |              |
| 127.7000000               | 1.5910000    |              |              |              |
| 54.4800000                | 0.6205000    |              |              |              |
| 23.8500000                | 0.2420000    |              |              |              |
| 9.4280000                 | 0.0901400    |              |              |              |
| 4.2900000                 | 0.0317000    |              |              |              |
| 1.9090000                 |              |              |              |              |
| 0.6270000                 |              |              |              |              |
| 0.2873000                 |              |              |              |              |
| 0.1172000                 |              |              |              |              |
| 0.0428000                 |              |              |              |              |

| Selenium (2s,17p,13d,3f,2g) |               |              |              |              |
|-----------------------------|---------------|--------------|--------------|--------------|
| s primitives                | p primitives  | d primitives | f primitives | g primitives |
| 15011000.0000000            | 25217.0000000 | 1143.4000000 | 0.2840000    | 0.5730000    |
| 2247500.0000000             | 5969.9000000  | 345.3300000  | 0.7097000    | 0.2630000    |
| 511450.0000000              | 1938.9000000  | 134.4600000  | 0.1240000    |              |
| 144870.0000000              | 741.6600000   | 59.5670000   |              |              |
| 47261.0000000               | 314.5000000   | 28.2830000   |              |              |
| 17062.0000000               | 143.3100000   | 14.0610000   |              |              |
| 6654.5000000                | 68.6500000    | 7.1390000    |              |              |
| 2759.8000000                | 33.9950000    | 3.6148000    |              |              |
| 1203.2000000                | 17.1850000    | 1.8072000    |              |              |
| 546.5300000                 | 8.5740000     | 0.8694400    |              |              |
| 256.6300000                 | 4.2206000     | 0.3703600    |              |              |
| 123.1400000                 | 2.0521000     | 0.1530000    |              |              |
| 58.2630000                  | 0.9615600     | 0.0619000    |              |              |
| 29.0230000                  | 0.4215100     |              |              |              |
| 14.4650000                  | 0.1762600     |              |              |              |
| 6.9348000                   | 0.0706630     |              |              |              |
| 3.3299000                   | 0.0265690     |              |              |              |
| 1.5600000                   |               |              |              |              |
| 0.4929100                   |               |              |              |              |
| 0.2352500                   |               |              |              |              |
| 0.1003700                   |               |              |              |              |
| 0.0381520                   |               |              |              |              |

**Basis set 3.** Primitive GTO basis used in the present work, these correspond to the fully uncontracted basis from EMSL web page (<https://bse.pnl.gov/bse/portal>)

| Carbon (10s,6p,1d) |              |              |
|--------------------|--------------|--------------|
| s primitives       | p primitives | d primitives |
| 8506.0384000       | 34.7094960   | 0.8000000    |
| 1275.7329000       | 7.9590883    |              |
| 290.3118700        | 2.3786972    |              |
| 82.0562000         | 0.81540065   |              |
| 26.4796410         | 0.28953785   |              |
| 9.2414585          | 0.10084754   |              |
| 3.3643530          |              |              |
| 0.87174164         |              |              |
| 0.36352352         |              |              |
| 0.12873135         |              |              |

| Silicon (12s,9p,1d) |              |              |
|---------------------|--------------|--------------|
| s primitives        | p primitives | d primitives |
| 79079.4340000       | 483.0235200  | 0.3500000    |
| 11855.0100000       | 14.2508100   |              |
| 2697.7051000        | 36.3877860   |              |
| 762.8722700         | 3.4117040    |              |
| 247.2845500         | 5.2884033    |              |
| 87.9312400          | 2.1374219    |              |
| 33.8232840          | 0.86468463   |              |
| 13.8681080          | 0.25489855   |              |
| 3.9920017           | 0.079397031  |              |
| 1.4659925           |              |              |
| 0.25271086          |              |              |
| 0.092491673         |              |              |

| Germanium (14s,11p,6d) |                |               |
|------------------------|----------------|---------------|
| s primitives           | p primitives   | d primitives  |
| 538981.208590          | 3196.8571212   | 74.776447903  |
| 80785.7689540          | 758.78574707   | 21.307762727  |
| 18387.3215390          | 246.40186162   | 7.3452966023  |
| 5210.3369514           | 94.429089481   | 2.5656881541  |
| 1707.4890772           | 39.602333266   | 0.81988587339 |
| 627.54854073           | 17.394023219   | 0.2460000     |
| 250.56696133           | 7.5468872383   |               |
| 102.39333101           | 3.1497947773   |               |
| 25.923923344           | 1.2651485767   |               |
| 11.389081191           | 0.30024031728  |               |
| 3.7472808901           | 0.087319187211 |               |
| 1.5027733307           |                |               |
| 0.24441033890          |                |               |
| 0.091205393545         |                |               |

| Oxygen (10s,6p,1d) |               |              |
|--------------------|---------------|--------------|
| s primitives       | p primitives  | d primitives |
| 15902.6474590      | 63.270524011  | 1.2000000    |
| 2384.9537829       | 14.623312295  |              |
| 542.71957182       | 4.4489518003  |              |
| 153.40407874       | 1.5281513180  |              |
| 49.545716140       | 0.52997315870 |              |
| 17.339649897       | 0.17509445998 |              |
| 6.3303355272       |               |              |
| 1.6995882201       |               |              |
| 0.68954491271      |               |              |
| 0.23936028181      |               |              |

| Sulfur (12s,9p,1d)    |               |              |
|-----------------------|---------------|--------------|
| s primitives          | p primitives  | d primitives |
| 103953.9500000        | 606.6936700   | 0.5500000    |
| 15583.7860000         | 143.5069600   |              |
| 3546.1293000          | 45.7461600    |              |
| 1002.6808000          | 16.8729120    |              |
| 324.9028800           | 6.6399196     |              |
| 115.5122500           | 2.6727135     |              |
| 44.5282100            | 1.0000089     |              |
| 18.3978920            | 0.35438942    |              |
| 5.5100683             | 0.11671305    |              |
| 2.1259867             |               |              |
| 0.43691893            |               |              |
| 0.15730851            |               |              |
| Selenium (14s,11p,6d) |               |              |
| s primitives          | p primitives  | d primitives |
| 609461.5616500        | 3656.2658173  | 94.493793993 |
| 91349.7284690         | 868.08211673  | 27.186508933 |
| 20791.8449100         | 282.38879090  | 9.5088741989 |
| 5892.0009402          | 108.68249518  | 3.4175441801 |
| 1931.5795523          | 45.880428373  | 1.1481458665 |
| 711.02173299          | 20.313633210  | 0.3380000    |
| 284.76563000          | 8.9138677790  |              |
| 116.67280336          | 3.8029430087  |              |
| 29.611379847          | 1.5911663461  |              |
| 13.118921596          | 0.44755579009 |              |
| 4.5252274573          | 0.13236319065 |              |
| 1.8747678530          |               |              |
| 0.35857737666         |               |              |
| 0.13617743845         |               |              |
